# Supplementary material for: The Final Days of Paracas in Cerro del Gentil, Chincha Valley, Peru
Source: PLoS One. 2016 May 4;11(5):e0153465. doi: 10.1371/journal.pone.0153465 (PMC4856392; doi:10.1371/journal.pone.0153465)
Supplement: S2 Table — (DOCX) [file pone.0153465.s003.docx]

| **Function (3)** | **Specific Shapes (2)** | **Tipology (1)** | **Total (1)** | **%(1)** | **Total (2)** | **%(2)** | **Total (3)** | **%(3)** |
| --- | --- | --- | --- | --- | --- | --- | --- | --- |
| Vessel for food production | Ollas | Neckless olla, rim with brace A | 2 | 0,92% | 41 | 18,89% | 48 | 22,12% |
| Neckless olla, rim with brace B | 1 | 0,46% |
| Recurved S rim, neckless olla | 4 | 1,84% |
| Convex neckless olla | 20 | 9,22% |
| Neckless olla with angular shoulder | 8 | 3,69% |
| Small convex neckless olla | 4 | 1,84% |
| Small neckless olla with angular shoulder | 2 | 0,92% |
| Necked jar | Necked jar | 7 | 3,23% | 7 | 3,23% |
| Food service vessel | Hemispherical bowl | Hemispherical slightly deep bowl | 43 | 19,82% | 51 | 23,50% | 169 | 77,88% |
| Hemispherical deep bowl | 8 | 3,69% |
| Hemispherical shallow bowl | Hemispherical shallow bowl | 50 | 23,04% | 50 | 23,04% |
| Plates | Plate with slightly vertical walled | 3 | 1,38% | 3 | 1,38% |
| Tazones | Tazón with slightly concave walled | 19 | 8,76% | 46 | 21,20% |
| Tazón with slightly vertical walled | 27 | 12,44% |
| Oversize bowl | Oversized, Hemispherical shallow bowl | 3 | 1,38% | 7 | 3,23% |
| Oversized tazón with slightly vertical walled | 4 | 1,84% |
| Glasses | Small right angle walled bowl | 6 | 2,76% | 8 | 3,69% |
| Small slightly concave walled bowl | 1 | 0,46% |
| Convex glass | 1 | 0,46% |
| Bottle | Spouted bottle | 4 | 1,84% | 4 | 1,84% |
| **TOTAL** | | | **217** | 100,00% | **217** | 100,00% | **217** | **100,00%** |
